# Supplementary material for: Longitudinal social contact data analysis: insights from 2 years of data collection in Belgium during the COVID-19 pandemic
Source: Research Square preprint supplement (doi:10.21203/rs.3.rs-2401924/v1), 2023-01-10
Supplement: Supplementary file 1 [file e1253f9b9c0b0ebea9768865.pdf]

Additional file 1 for: "Longitudinal social contact data analysis:  
insights from 2 years of data collection in Belgium during the  
COVID-19 pandemic"

Neilshan Loedy<sup>1\*</sup>, Pietro Coletti<sup>1</sup>, James Wambua<sup>1</sup>, Lisa Hermans<sup>1</sup>,  
Lander Willem<sup>2</sup>, Christopher I. Jarvis<sup>3</sup>, Kerry L.M. Wong<sup>3</sup>, W. John Edmunds<sup>3</sup>,  
Alexis Robert<sup>3</sup>, Quentin J. Leclerc<sup>3,4,7</sup>, Ammy Gimma<sup>3</sup>, Geert Molenberghs<sup>1,6</sup>,  
Philippe Beutels<sup>2,5</sup>, Christel Faes<sup>1</sup>, Niel Hens<sup>1,2</sup>

<sup>1</sup>Data Science Institute, I-BioStat, Hasselt University, Hasselt, Belgium.

<sup>2</sup>Centre for Health Economics Research and Modelling Infectious Diseases, Vaccine & Infectious Disease Institute, University of Antwerp, Antwerp, Belgium.

<sup>3</sup>Centre for Mathematical Modelling of Infectious Diseases, Department of Infectious Disease Epidemiology, Faculty of Epidemiology Population Health, London School of Hygiene Tropical Medicine, London, United Kingdom.

<sup>4</sup>Department of Infectious Disease Epidemiology, Faculty of Epidemiology and Public Health, London School of Hygiene Tropical Medicine, London, United Kingdom. <sup>5</sup>School of Public Health and Community Medicine, The University of New South Wales, Sydney, Australia.

<sup>6</sup>L-BioStat, Department of Public Health and Primary Care, Faculty of Medicine, KU Leuven, Leuven, Belgium.

<sup>7</sup>Epidemiology and modelling of bacterial escape to antimicrobials, Institut Pasteur, Paris, France.

\* Corresponding author: neilshan.loedy@uhasselt.be

## **1. Additional file 1 : Supporting information**

This additional file provides supporting information to support the findings on the main article.

Pictures/plot\_comix\_1\_8.png

**Figure S1:** Calendar of non-pharmaceutical interventions (NPIs) and CoMix waves for the first survey wave (waves 1–8) [1]

**Table S1:** Description of the parameters

| Parameter          | Description                                                                                                                                                                                                                                                                                                                                       | Variable                                                      |
|--------------------|---------------------------------------------------------------------------------------------------------------------------------------------------------------------------------------------------------------------------------------------------------------------------------------------------------------------------------------------------|---------------------------------------------------------------|
| Household size     | The number of people who live at the same address and with whom the participant shares a kitchen.                                                                                                                                                                                                                                                 | Elderly (1, 2, 3+), Adults (1, 2, 3, 4+), Children (2, 3, 4+) |
| Area               | Region of residency                                                                                                                                                                                                                                                                                                                               | Brussels, Flemish, Wallonia                                   |
| Wave bin           | Number of participation on the survey                                                                                                                                                                                                                                                                                                             | 1, 2, 3, ..., 7, 8+                                           |
| Elevated risk      | The condition when participants have a chronic respiratory disease, chronic heart condition, chronic kidney disease, chronic liver disease, chronic neurological disease, diabetes (any types), a weakened immune system (due to disease or medication), asplenia or malfunctioning spleen, morbid obesity ( $BMI \geq 40$ ), and pregnant women. | Yes, No                                                       |
| Weekend            | Saturday or Sunday                                                                                                                                                                                                                                                                                                                                | Weekday, Weekend                                              |
| Holiday            | Belgium nationally recognized non-working day when most business and institutions are closed                                                                                                                                                                                                                                                      | Yes, No                                                       |
| Face mask          | The usage of face masks when participants are doing the reported contacts.                                                                                                                                                                                                                                                                        | Yes, No                                                       |
| Vaccination status | Vaccination conditions of participants for at least one injection of the vaccine                                                                                                                                                                                                                                                                  | Yes, No                                                       |
| Symptomatic status | The condition when participants have a fever or high temperature, a cough that has lasted for at least several hours, shortness of breath, aches in arms or legs, blocked nose, sore throat, or feeling tired.                                                                                                                                    | Yes, No                                                       |

**Table S2:** Summary of survey waves

| Wave | Period             | Wave | Period             | Wave | Period             |
|------|--------------------|------|--------------------|------|--------------------|
| 09   | 12 Nov - 19 Nov'20 | 21   | 27 Apr - 03 May'21 | 33   | 12 Oct - 17 Oct'21 |
| 10   | 27 Nov - 09 Dec'20 | 22   | 12 May - 19 May'21 | 34   | 27 Oct - 03 Nov'21 |
| 11   | 10 Dec - 17 Dec'20 | 23   | 25 May - 01 Jun'21 | 35   | 09 Nov - 15 Nov'21 |
| 12   | 22 Dec - 04 Jan'21 | 24   | 09 Jun - 16 Jun'21 | 36   | 23 Nov - 29 Nov'21 |
| 13   | 05 Jan - 11 Jan'21 | 25   | 22 Jun - 27 Jun'21 | 37   | 07 Dec - 13 Dec'21 |
| 14   | 19 Jan - 24 Jan'21 | 26   | 06 Jul - 14 Jul'21 | 38   | 21 Dec - 28 Dec'21 |
| 15   | 02 Feb - 07 Feb'21 | 27   | 20 Jul - 26 Jul'21 | 39   | 04 Jan - 11 Jan'22 |
| 16   | 16 Feb - 23 Feb'21 | 28   | 03 Aug - 10 Aug'21 | 40   | 18 Jan - 23 Jan'22 |
| 17   | 02 Mar - 09 Mar'21 | 29   | 17 Aug - 23 Aug'21 | 41   | 01 Feb - 08 Feb'22 |
| 18   | 16 Mar - 23 Mar'21 | 30   | 31 Aug - 07 Sep'21 | 42   | 16 Feb - 22 Feb'22 |
| 19   | 30 Mar - 06 Apr'21 | 31   | 14 Sep - 20 Sep'21 | 43   | 01 Mar - 08 Mar'22 |
| 20   | 13 Apr - 19 Apr'21 | 32   | 28 Sep - 04 Oct'21 |      |                    |

Pictures/dplot\_new\_only.png

**Figure S2:** Distribution of age categories of new participants in Belgium CoMix survey

**Table S3:** Summary of CoMix survey. The percentages are rounded to two decimal place and thus might not add up to 100%

| Waves of participation    | 1             | 2              | 3             | 4             | 5             | 6             | 7             | 8+             |
|---------------------------|---------------|----------------|---------------|---------------|---------------|---------------|---------------|----------------|
| All                       | 7356          | 4616           | 3606          | 3156          | 2897          | 2632          | 2469          | 28192          |
| <b>Participants age</b>   |               |                |               |               |               |               |               |                |
| Elderly                   | 366 (4.98%)   | 275 (5.96%)    | 249 (6.91%)   | 258 (8.17%)   | 254 (8.77%)   | 244 (9.27%)   | 245 (9.92%)   | 3528 (12.51%)  |
| Adults                    | 4462 (60.66%) | 2p779 (60.20%) | 2214 (61.40%) | 2050 (64.96%) | 1912 (66.00%) | 1714 (65.12%) | 1605 (65.01%) | 18901 (67.04%) |
| Children                  | 2528 (34.37%) | 1562 (33.84%)  | 1143 (31.70%) | 848 (26.87%)  | 731 (25.23%)  | 674 (25.61%)  | 619 (25.07%)  | 5763 (20.44%)  |
| <b>Contacts age</b>       |               |                |               |               |               |               |               |                |
| Elderly                   | 1382 (18.79%) | 928 (20.10%)   | 796 (22.07%)  | 878 (27.82%)  | 832 (28.72%)  | 764 (29.03%)  | 743 (30.09%)  | 9212 (32.68%)  |
| Adults                    | 4206 (57.18%) | 2713 (58.77%)  | 2141 (59.37%) | 1725 (54.66%) | 1573 (54.30%) | 1429 (54.29%) | 1336 (54.11%) | 15020 (53.28%) |
| Children                  | 1768 (24.03%) | 975 (21.12%)   | 669 (18.55%)  | 553 (17.52%)  | 492 (16.98%)  | 439 (16.68%)  | 390 (15.80%)  | 3960 (14.05%)  |
| <b>Weekday/Weekend</b>    |               |                |               |               |               |               |               |                |
| Weekday                   | 6946 (94.43%) | 3840 (83.19%)  | 2956 (81.97%) | 2576 (81.62%) | 2191 (75.63%) | 1921 (72.99%) | 1818 (73.63%) | 19520 (69.24%) |
| Weekend                   | 410 (5.57%)   | 776 (16.81%)   | 650 (18.03%)  | 580 (18.38%)  | 706 (24.37%)  | 711 (27.01%)  | 651 (26.37%)  | 8672 (30.76%)  |
| <b>Area</b>               |               |                |               |               |               |               |               |                |
| Brussels Central Region   | 640 (8.70%)   | 433 (9.38%)    | 298 (8.26%)   | 259 (8.21%)   | 237 (8.18%)   | 194 (7.37%)   | 199 (8.06%)   | 1936 (6.87%)   |
| Flemish Region            | 4141 (56.29%) | 2617 (56.69%)  | 2064 (57.24%) | 1864 (59.06%) | 1746 (60.27%) | 1604 (60.94%) | 1479 (59.90%) | 17985 (63.79%) |
| Wallonia Region           | 2575 (35.01%) | 1566 (33.93%)  | 1244 (34.50%) | 1033 (32.73%) | 914 (31.55%)  | 834 (31.69%)  | 791 (32.04%)  | 8271 (29.34%)  |
| <b>Holiday</b>            |               |                |               |               |               |               |               |                |
| Holiday (Y)               | 1947 (26.47%) | 956 (20.71%)   | 956 (20.71%)  | 1892 (59.95%) | 804 (27.75%)  | 757 (28.76%)  | 745 (30.17%)  | 8653 (30.69%)  |
| Holiday (N)               | 5409 (73.53%) | 3660 (79.29%)  | 2610 (72.38%) | 1264 (40.05%) | 2093 (72.25%) | 1875 (71.24%) | 1724 (69.83%) | 19539 (69.31%) |
| <b>Household size</b>     |               |                |               |               |               |               |               |                |
| 1                         | 832 (11.31%)  | 596 (12.91%)   | 530 (14.70%)  | 477 (15.11%)  | 445 (15.36%)  | 387 (14.70%)  | 357 (14.46%)  | 3343 (11.86%)  |
| 2                         | 1943 (26.41%) | 1393 (30.18%)  | 1173 (32.53%) | 1122 (35.55%) | 1062 (36.66%) | 987 (37.50%)  | 956 (38.72%)  | 12654 (44.89%) |
| 3                         | 1694 (23.03%) | 974 (21.10%)   | 741 (20.55%)  | 639 (20.25%)  | 571 (19.71%)  | 525 (19.95%)  | 488 (19.77%)  | 5716 (20.28%)  |
| 4+                        | 2887 (39.25%) | 1653 (35.81%)  | 1162 (32.22%) | 918 (29.09%)  | 819 (28.27%)  | 733 (27.85%)  | 668 (27.06%)  | 6479 (22.98%)  |
| <b>Elevated risk</b>      |               |                |               |               |               |               |               |                |
| Yes                       | 1328 (18.05%) | 911 (19.74%)   | 730 (20.24%)  | 675 (21.39%)  | 641 (22.13%)  | 609 (23.14%)  | 575 (23.29%)  | 7949 (28.20%)  |
| No                        | 6028 (81.95%) | 3705 (80.26%)  | 2876 (79.76%) | 2481 (78.61%) | 2256 (77.87%) | 2023 (76.86%) | 1894 (76.71%) | 20243 (71.80%) |
| <b>Face mask usage</b>    |               |                |               |               |               |               |               |                |
| Yes                       | 2712 (63.13%) | 2908 (63.00%)  | 2295 (63.64%) | 2064 (65.43%) | 1872 (64.62%) | 1640 (62.31%) | 1506 (61.00%) | 17350 (61.54%) |
| No                        | 4644 (36.87%) | 1708 (37.00%)  | 1311 (34.57%) | 1091 (34.57%) | 1025 (35.38%) | 992 (37.67%)  | 963 (39.00%)  | 10842 (38.46%) |
| <b>Symptomatic status</b> |               |                |               |               |               |               |               |                |
| Yes                       | 4222 (57.40%) | 2559 (55.44%)  | 1847 (51.22%) | 1490 (47.21%) | 1334 (46.05%) | 1212 (46.05%) | 1096 (44.39%) | 10793 (38.28%) |
| No                        | 3134 (42.60%) | 2057 (44.56%)  | 1759 (48.78%) | 1666 (52.79%) | 1563 (53.95%) | 1420 (53.95%) | 1373 (55.61%) | 17399 (61.72%) |
| <b>Vaccination status</b> |               |                |               |               |               |               |               |                |
| Yes                       | 2292 (31.16%) | 964 (20.88%)   | 675 (18.72%)  | 640 (20.28%)  | 627 (21.64%)  | 637 (24.20%)  | 698 (28.27%)  | 15425 (54.71%) |
| No                        | 3167 (43.05%) | 2341 (50.71%)  | 1891 (52.44%) | 1615 (51.17%) | 1485 (51.26%) | 1287 (48.90%) | 1116 (45.20%) | 6804 (24.13%)  |
| NA's                      | 1897 (25.79%) | 1311 (28.40%)  | 1040 (28.84%) | 901 (28.55%)  | 785 (27.10%)  | 785 (26.90%)  | 655 (26.53%)  | 5963 (21.15%)  |

Pictures/arrange\_CIplot\_scm.png

**Figure S3:** Visualization of mixing pattern between age categories based on relative number of contacts (*red dot*) and 95% confidence interval based on NBI GAMLSS model

Pictures/arrange\_plot\_smooth2.png

Pictures/arrange\_plot\_smooth.png

**Figure S4:** Relative number of contacts and 95% confidence interval based on smoothing parameters on NBI GAMLSS model for different age groups; Penalized Varying Coefficient for (A) *Elderly* and (B) *Adults* (Vaccination status (*box*) and Symptomatic status (*line*)), Cubic Spline for (C) *Children*.

Summary statistics of GAMLSS Model for the variance on Children and Elderly (Table S4 – S5). Note that only random intercept was used to model the variance of GAMLSS Model Adults.

**Table S4:** Children's GAMLSS model parameter estimates on the variance

| Estimate                                   | RI       | RI.CI           |
|--------------------------------------------|----------|-----------------|
| Area (Flemish Region)                      | 1.5730*  | (1.1340,2.1820) |
| Area (Wallonia Region)                     | 1.1960   | (0.8590,1.6660) |
| Household size (2)                         | 1.2710   | (0.8100,1.9950) |
| Household size (4+)                        | 1.3440   | (0.9360,1.9320) |
| Wave bin (2)                               | 0.9370   | (0.8000,1.0950) |
| Wave bin (3)                               | 0.6750** | (0.5700,0.8010) |
| Wave bin (4)                               | 0.6990*  | (0.5800,0.8420) |
| Wave bin (5)                               | 0.5320** | (0.4340,0.6520) |
| Wave bin (6)                               | 0.4590** | (0.3700,0.5700) |
| Wave bin (7)                               | 0.5430** | (0.4360,0.6760) |
| Wave bin (8+)                              | 0.3890** | (0.3410,0.4450) |
| Weekend                                    | 0.8030*  | (0.7050,0.9130) |
| Holiday (Y)                                | 0.7330** | (0.6590,0.8150) |
| Face Mask (Y)                              | 1.0020   | (0.9190,1.0920) |
| Weekend:Holiday (Y)                        | 1.1430   | (0.9130,1.4320) |
| Area (Flemish Region):Household size (2)   | 0.7400   | (0.4520,1.2130) |
| Area (Wallonia Region):Household size (2)  | 0.7080   | (0.4120,1.2190) |
| Area (Flemish Region):Household size (4+)  | 0.5040*  | (0.3450,0.7370) |
| Area (Wallonia Region):Household size (4+) | 0.7650   | (0.5160,1.1350) |

(\*)p-value &lt;0.05; (\*\*)p-value &lt;0.0001

**Table S5:** Elderly's GAMLSS model parameter estimates on the variance

| Estimate            | RI       | RI.CI           |
|---------------------|----------|-----------------|
| Household size (1)  | 1.8300** | (1.3960,2.3980) |
| Household size (3+) | 0.0030** | (0.0010,0.0050) |
| Wave bin (2)        | 0.4580   | (0.1790,1.1680) |
| Wave bin (3)        | 0.6000   | (0.2200,1.6380) |
| Wave bin (4)        | 1.0930   | (0.4400,2.7110) |
| Wave bin (5)        | 0.7680   | (0.3140,1.8770) |
| Wave bin (6)        | 0.4320   | (0.1630,1.1490) |
| Wave bin (7)        | 0.3280*  | (0.1230,0.8690) |
| Wave bin (8+)       | 0.4260   | (0.1800,1.0070) |
| Elevated Risk (N)   | 0.8670   | (0.6730,1.1160) |
| Weekend             | 1.0360   | (0.7600,1.4120) |
| Holiday (Y)         | 0.8950   | (0.6300,1.2710) |
| Face Mask (Y)       | 0.7070*  | (0.5310,0.9410) |
| Weekend:Holiday (Y) | 1.0170   | (0.5820,1.7780) |

(\*)p-value &lt;0.05; (\*\*)p-value &lt;0.0001

Pictures/arrange\_comp\_marg.png

**Figure S5:** Basic goodness-of-fit plots of GAMLSS NBI for Elderly ( $R^2 = 62.19\%$ ) (A), Adults ( $R^2 = 76.34\%$ ) (B), and Children ( $R^2 = 73.98\%$ ) (C) for the average of number of contacts reported versus the marginal predictions

Pictures/arrange\_scm\_mp\_9\_11.png

**Figure S6:** Social contact matrices; average number (wave 9–wave 11) of daily reported contacts (A) *without* (B) *with under-reporting due to fatigue correction*

Pictures/arrange\_scm\_mp\_11p.png

**Figure S7:** Social contact matrices; average number (wave 12–wave 43) of daily reported contacts (*A*) *without* (*B*) *with under-reporting due to fatigue correction*

Pictures/arrange\_plot\_pred\_reci.png

**Figure S8:** Symmetric social contact matrices taking into account reciprocity in the contact patterns; Average number (wave 9–wave 43) of daily reported contacts (*A*) *without* (*B*) *with under-reporting due to fatigue correction*



Pictures/arrange\_plot\_pred.png

**Figure S9:** Social contact matrices; average number of daily reported contacts per wave (A) *without fatigue correction*. (B) *with fatigue correction*.

Pictures/arrange\_plot\_scm\_reci.png

**Figure S10:** Symmetric social contact matrices; average number of daily reported contacts per wave (A) *without fatigue correction*. (B) *with fatigue correction*.

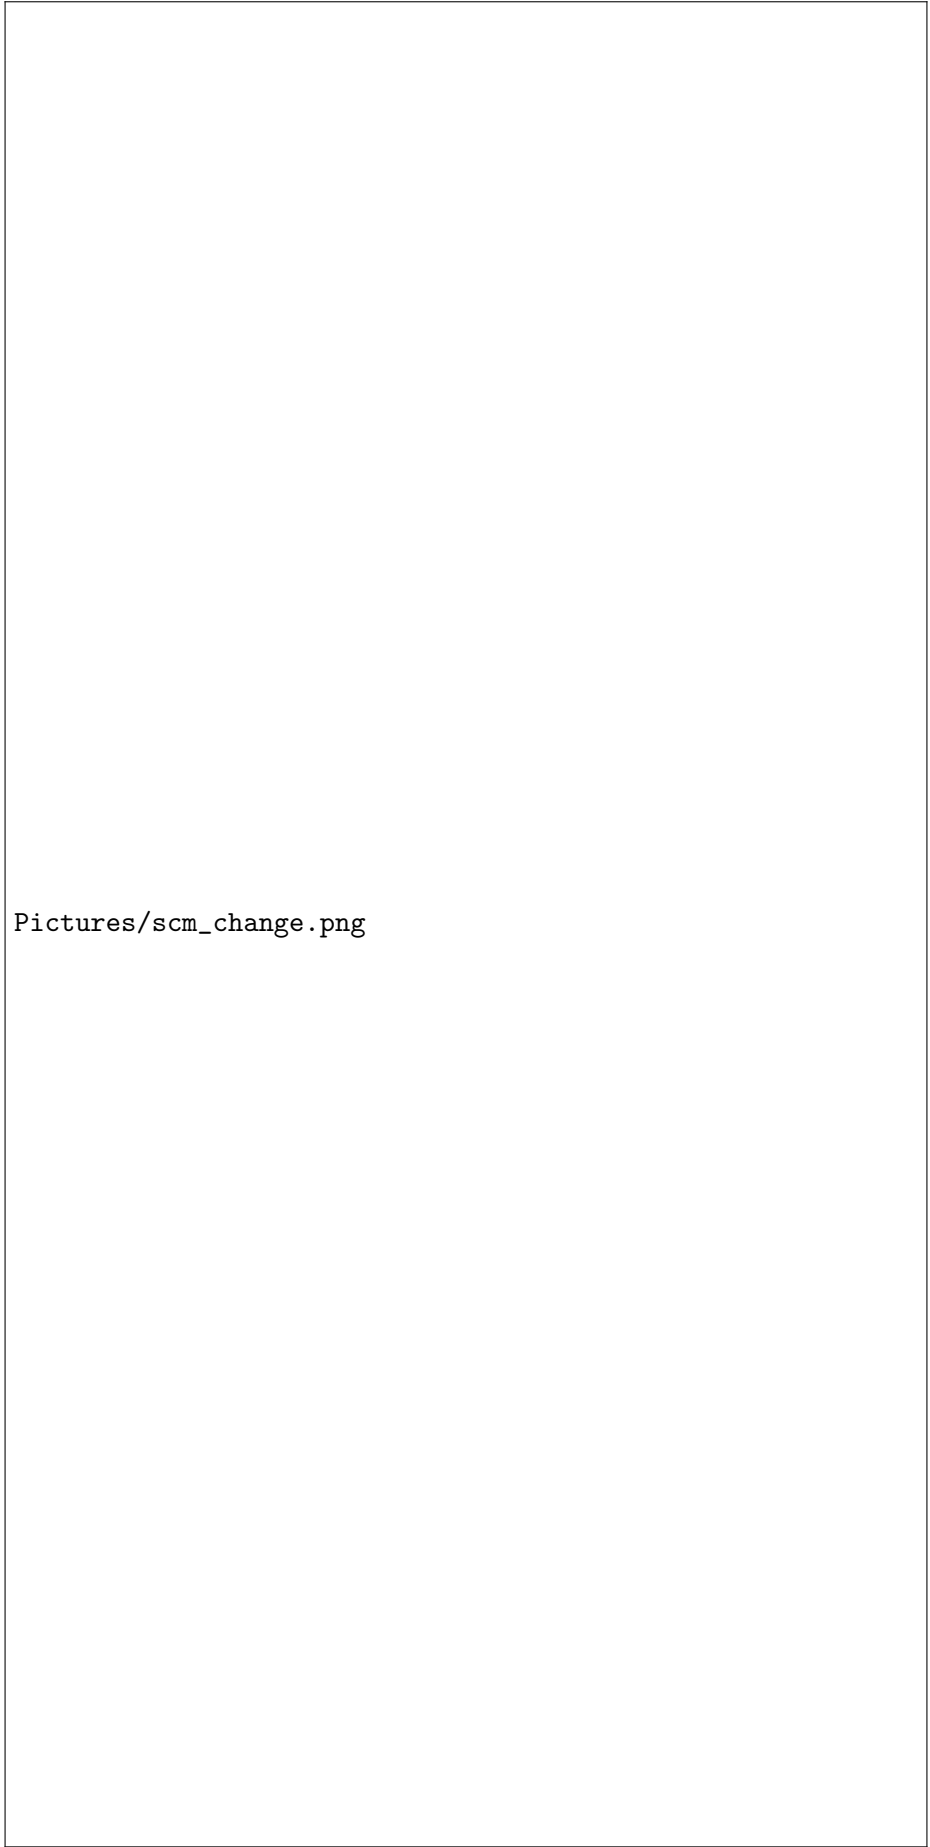

Pictures/scm\_change.png

**Figure S11:** Age-specific percentages of change in average number of contacts by correcting for under-reporting due to fatigue per wave.

Pictures/arrange\_crates.png

**Figure S12:** Social contact matrices; average number of contact rates per wave (*A*) *without fatigue correction*. (*B*) *with fatigue correction*.

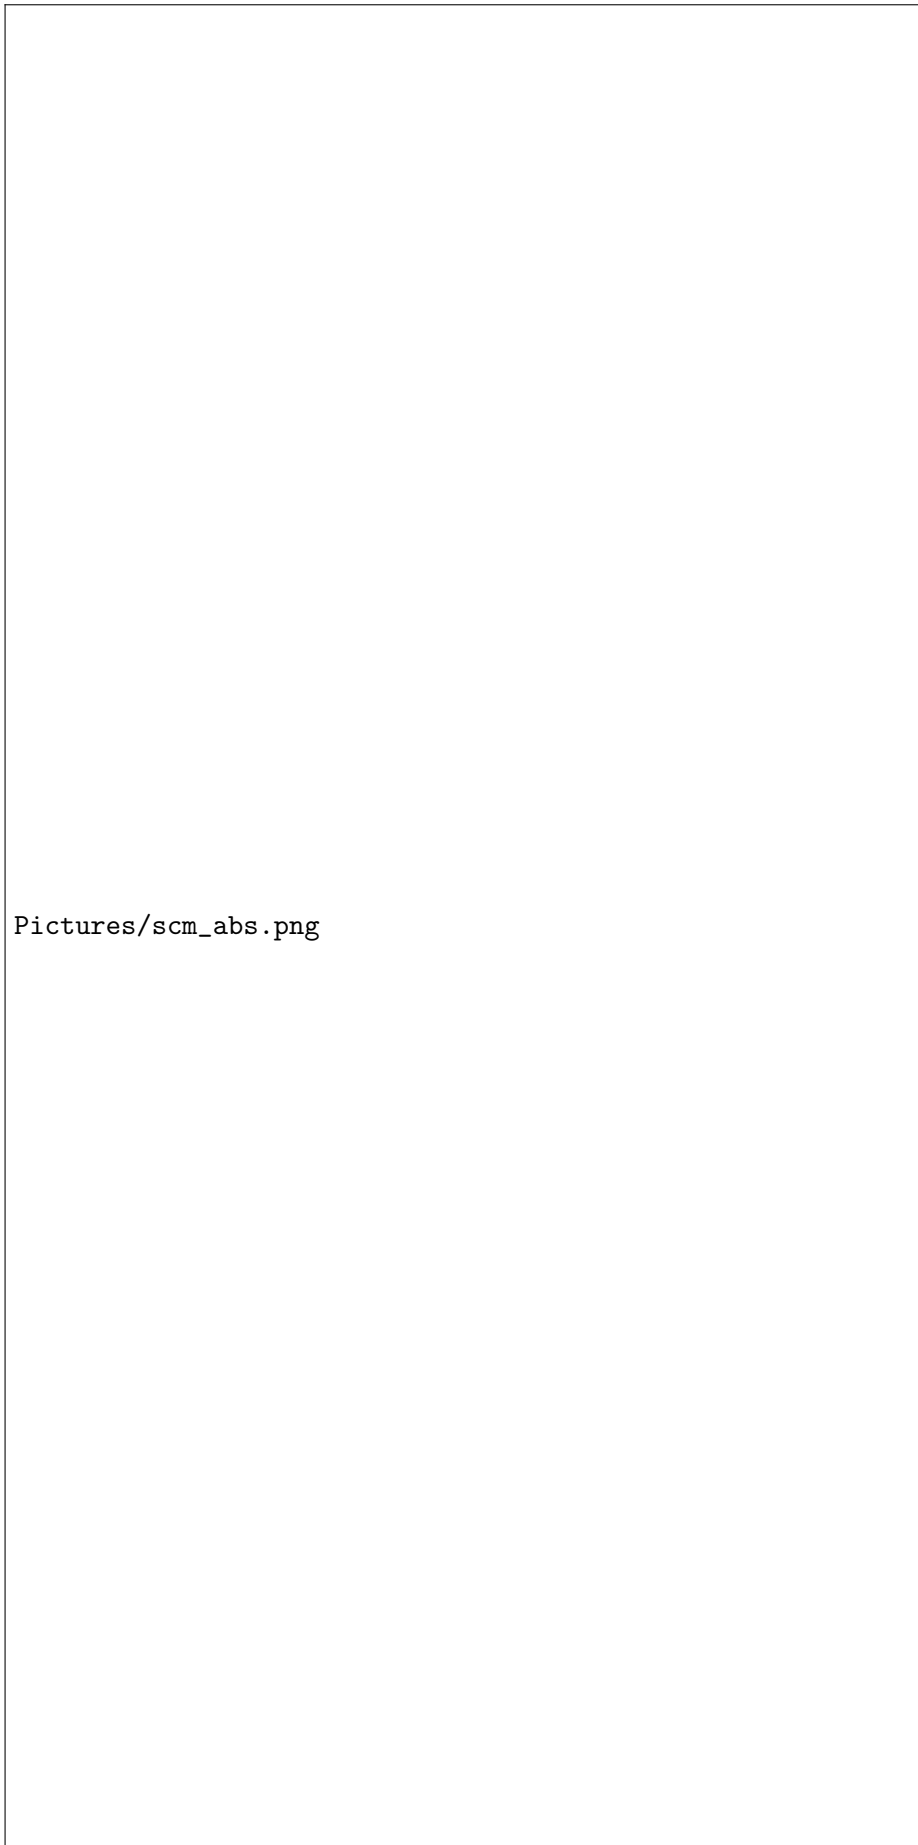

**Figure S13:** Changes in average number of contacts for each wave with and without fatigue correction.

Pictures/arrange\_rt\_appendix.png

**Figure S14:** (A) Relative changes in  $R_0$  with and without correcting for under-reporting due to fatigue and (B) The impact of correcting for under-reporting due to fatigue on the incidence reproduction number estimated from heterogeneous CoMix data.

Pictures/plot\_right\_eigen\_final.png

**Figure S15:** Changes in relative incidence (%) using homogeneous (circle) and heterogeneous (triangle) susceptibility ( $a_i = (0.39, 0.83, 0.74)$ ) and infectivity ( $h_j = (0.55, 0.79, 0.99)$ ) between age categories (Children, Adults, Elderly) per wave [2]; (Blue) Without correction (Orange) With correction on under-reporting due to fatigue.

## References

- [1] Coletti, P., Wambua, J., Gimma, A., Willem, L., Vercruysse, S., Vanhoutte, B., Jarvis, C.I., Van Zandvoort, K., Edmunds, J., Beutels, P., Hens, N.: Comix: comparing mixing patterns in the belgian population during and after lockdown. *Scientific Reports* **10**(1), 21885 (2020). doi:10.1038/s41598-020-78540-7
- [2] Franco, N., Coletti, P., Willem, L., Angeli, L., Lajot, A., Abrams, S., Beutels, P., Faes, C., Hens, N.: Inferring age-specific differences in susceptibility to and infectiousness upon sars-cov-2 infection based on belgian social contact data. *PLoS computational biology* **18**(3), 1009965 (2022)
